# Supplementary material for: Investigating the Role of Telomere and Telomerase Associated Genes and Proteins in Endometrial Cancer
Source: MDPI journal article supplement (doi:10.3390/mps3030063), 2020-09-03
Supplement: s1 [file s1]

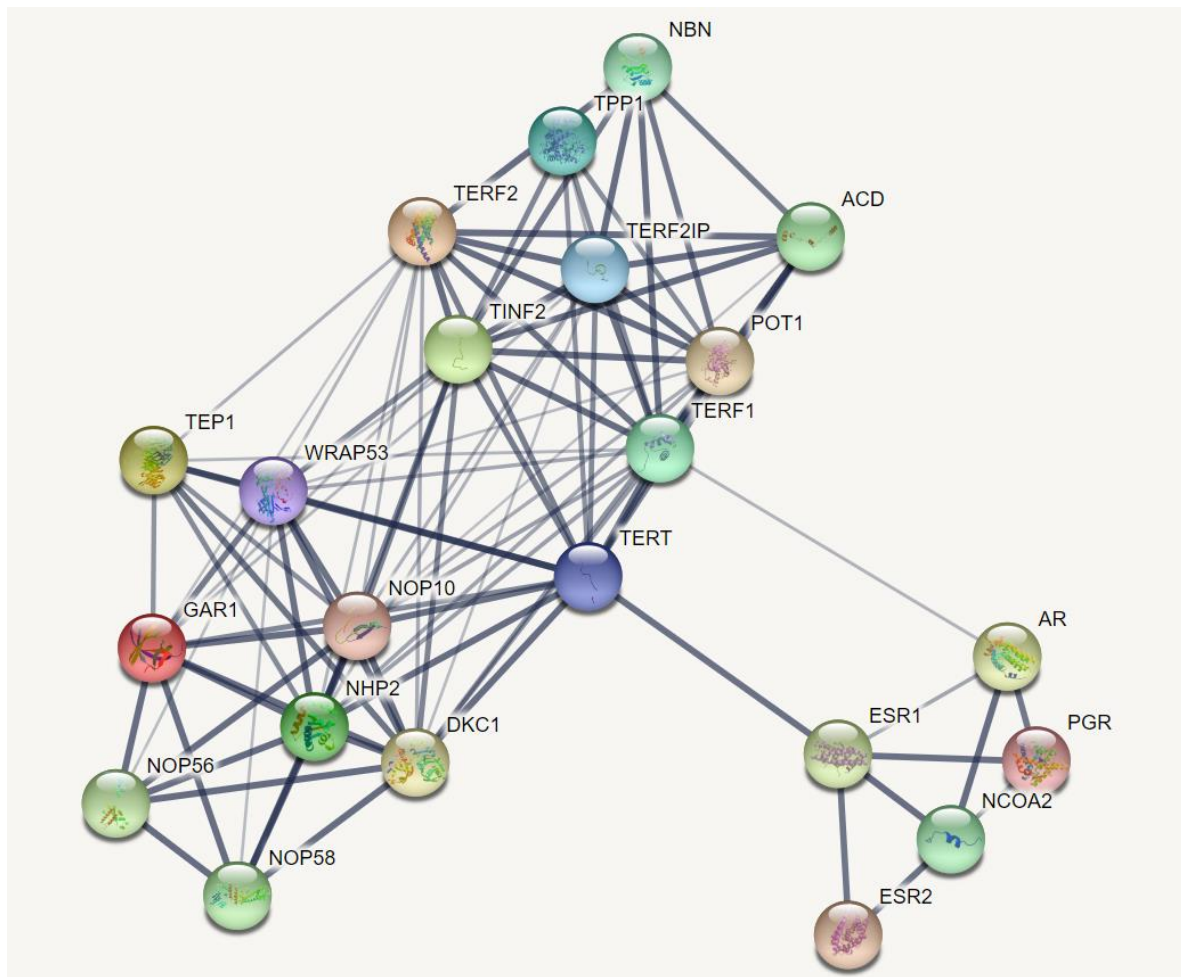

**Figure S3. Telomerase and Shelterin Complex Interactions.** Diagram demonstrating the interactions between the components of the telomerase and shelterin complexes, and steroid hormone receptors expanded by one level in STRING.
