# Supplementary material for: Investigating the Role of Telomere and Telomerase Associated Genes and Proteins in Endometrial Cancer
Source: MDPI journal article supplement (doi:10.3390/mps3030063), 2020-09-03
Supplement: s1 [file s1]

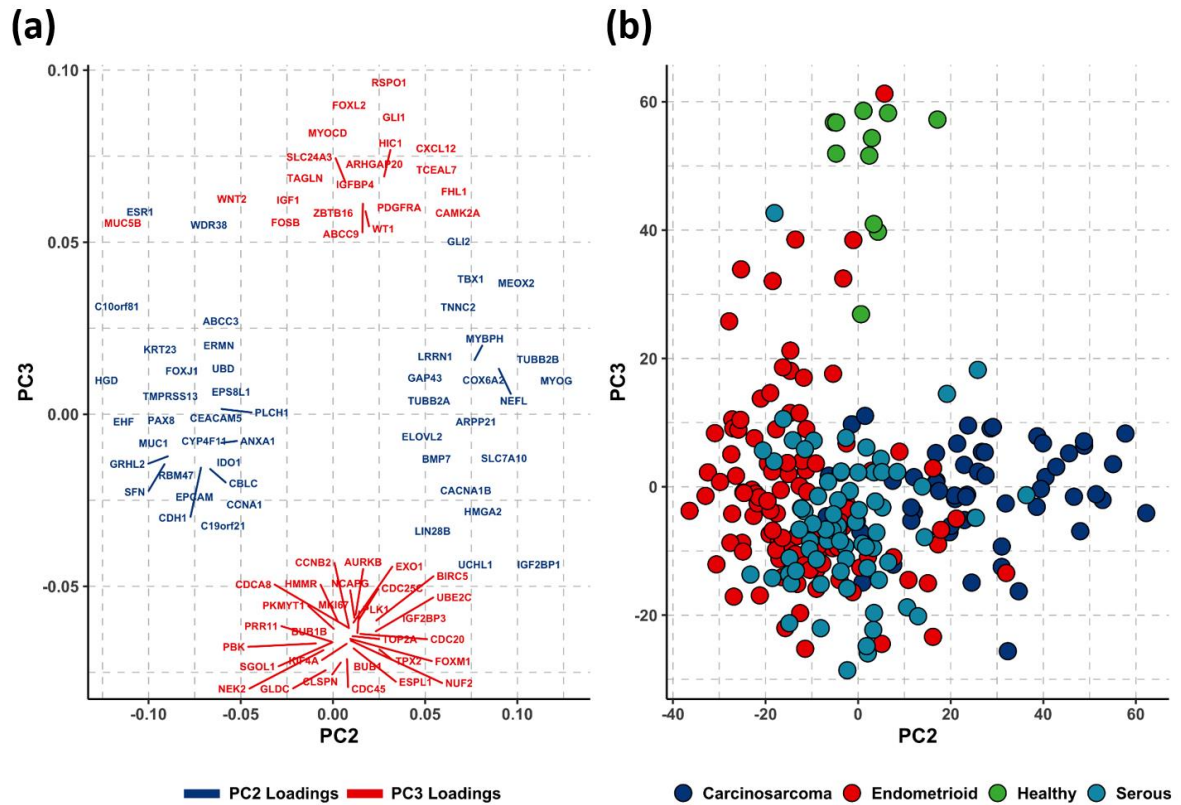

**Figure S2.** (a) Loading plot of the top 50 genes contributing to variance from principal components (PCs) 2 and 3. (b) Principal component analysis (PCA) of log normalised counts per million (CPM) expression data displaying PC2 (10.45% variance) and PC3 (6.95% variance) with samples coloured by cancer subtype.
